# Supplementary material for: The Role of Social Contacts and Original Antigenic Sin in Shaping the Age Pattern of Immunity to Seasonal Influenza
Source: PubMed Central journal article supplement (PMC3486889; doi:10.1371/journal.pcbi.1002741), 2012-10-25
Supplement: pcbi.1002741.s007.pdf [file pcbi.1002741.s007.pdf]

**Table S3: Estimated average time between infections in years, by age class.**

| Country   | Subtype | 0–4 | 5–14 | 15–49 | 50–99 |
|-----------|---------|-----|------|-------|-------|
| Finland   | H1N1    | 8.4 | 6.6  | 15.7  | 37.1  |
|           | H3N2    | 7.2 | 7.2  | 13.0  | 25.8  |
| Australia | H1N1    | 4.1 | 3.4  | 7.3   | 16.6  |
|           | H3N2    | >50 | >50  | >50   | >50   |
