# Supplementary material for: The Role of Social Contacts and Original Antigenic Sin in Shaping the Age Pattern of Immunity to Seasonal Influenza
Source: PLOS journal article supplement (doi:10.1371/journal.pcbi.1002741), 2012-10-25
Supplement: S6 (10.1371/journal.pcbi.1002741.s006) [file journal.pcbi.1002741.s006]

**Table S2: Parameter estimates obtained in the eight models.**

| Model | $\tau$ | $R_0^{f,1}$ | $R_0^{f,3}$ | $R_0^{a,1}$ | $R_0^{a,3}$ | $\alpha_1$ | $\alpha_3$ | $A_1$ | $A_3$ | $v_1$ | $v_3$ |
|-------|--------|-------------|-------------|-------------|-------------|------------|------------|-------|-------|-------|-------|
| 1     | 0.93   | 1.24        | 2.15        | 1.40        | 1.11        | 0.25       | 0.17       | 0.34  | 1.20  | 0.06  | 0.24  |
| 2     | –      | 1.22        | 2.02        | 1.27        | 1.11        | 1.22       | 0.85       | 0.35  | 1.71  | 0.13  | 0.23  |
| 3     | 0.20   | 1.23        | 2.17        | 1.36        | 1.10        | 0.15       | 0.34       | 0.27  | 1.07  | 0.10  | 0.21  |
| 4     | –      | 1.26        | 2.25        | 1.31        | 1.10        | 0.19       | 0.32       | 0.31  | 0.95  | 0.10  | 0.21  |
| 5     | 0.96   | 1.23        | 2.10        | 1.45        | 1.13        | 0.24       | 0.16       | 0.29  | 1.09  | 0.07  | 0.16  |
| 6     | –      | 1.32        | 5.13        | 1.83        | 1.12        | 0.76       | 0.86       | 0.15  | 0.55  | 0.07  | 0.17  |
| 7     | 0.40   | 1.32        | 3.35        | 1.69        | 1.10        | 0.12       | 0.27       | 0.19  | 0.65  | 0.06  | 0.16  |
| 8     | –      | 1.33        | 3.02        | 1.65        | 1.10        | 0.12       | 0.33       | 0.20  | 0.68  | 0.07  | 0.21  |
